# Supplementary material
Source: publisher figshare collection journal article supplement (https://acs.figshare.com/ndownloader/files/4702417)
Supplement: Supplementary file 1 [file 4702417]

 
data_shelxl 
 
_audit_creation_method            SHELXL-97 
_chemical_name_systematic 
; 
 ? 
; 
_chemical_name_common             ? 
_chemical_melting_point           ? 
_chemical_formula_moiety          
 'C14 H16 O2' 
_chemical_formula_sum 
 'C14 H16 O2' 
_chemical_formula_weight          216.27 
 
loop_ 
 _atom_type_symbol 
 _atom_type_description 
 _atom_type_scat_dispersion_real 
 _atom_type_scat_dispersion_imag 
 _atom_type_scat_source 
 'C'  'C'   0.0033   0.0016 
 'International Tables Vol C Tables 4.2.6.8 and 6.1.1.4' 
 'H'  'H'   0.0000   0.0000 
 'International Tables Vol C Tables 4.2.6.8 and 6.1.1.4' 
 'O'  'O'   0.0106   0.0060 
 'International Tables Vol C Tables 4.2.6.8 and 6.1.1.4' 
 
_symmetry_cell_setting            monoclinic 
_symmetry_space_group_name_H-M    'P 21/a' 
_symmetry_space_group_name_Hall   '-P 2yab'
_symmetry_Int_Tables_number        14
 
loop_ 
 _symmetry_equiv_pos_as_xyz 
 'x, y, z' 
 '-x+1/2, y+1/2, -z' 
 '-x, -y, -z' 
 'x-1/2, -y-1/2, z' 
 
_cell_length_a                    14.133(7) 
_cell_length_b                    5.250(3) 
_cell_length_c                    16.352(8) 
_cell_angle_alpha                 90.00 
_cell_angle_beta                  96.172(18) 
_cell_angle_gamma                 90.00 
_cell_volume                      1206.3(12) 
_cell_formula_units_Z             4 
_cell_measurement_temperature     123(2) 
_cell_measurement_reflns_used     8435 
_cell_measurement_theta_min       3.0 
_cell_measurement_theta_max       27.5 
 
_exptl_crystal_description        'prism' 
_exptl_crystal_colour             'colorless'
_exptl_crystal_size_max           0.40 
_exptl_crystal_size_mid           0.20 
_exptl_crystal_size_min           0.10 
_exptl_crystal_density_meas       ? 
_exptl_crystal_density_diffrn     1.191 
_exptl_crystal_density_method     'not measured' 
_exptl_crystal_F_000              464 
_exptl_absorpt_coefficient_mu     0.078 
_exptl_absorpt_correction_type    none 
_exptl_absorpt_correction_T_min   0.9694 
_exptl_absorpt_correction_T_max   0.9922 
_exptl_absorpt_process_details    ? 
 
_exptl_special_details 
; 
 ? 
; 
 
_diffrn_ambient_temperature       123(2) 
_diffrn_radiation_wavelength      0.71075 
_diffrn_radiation_type            MoK\a 
_diffrn_radiation_source          'fine-focus sealed tube' 
_diffrn_radiation_monochromator   graphite 
_diffrn_measurement_device_type   'Rigaku RAXIS-RAPID' 
_diffrn_measurement_method        \w 
_diffrn_detector_area_resol_mean  10.00 
_diffrn_standards_number          ? 
_diffrn_standards_interval_count  ? 
_diffrn_standards_interval_time   ? 
_diffrn_standards_decay_%         ? 
_diffrn_reflns_number             11275 
_diffrn_reflns_av_R_equivalents   0.0514 
_diffrn_reflns_av_sigmaI/netI     0.0486 
_diffrn_reflns_limit_h_min        -18 
_diffrn_reflns_limit_h_max        16 
_diffrn_reflns_limit_k_min        -6 
_diffrn_reflns_limit_k_max        6 
_diffrn_reflns_limit_l_min        -20 
_diffrn_reflns_limit_l_max        21 
_diffrn_reflns_theta_min          3.03 
_diffrn_reflns_theta_max          27.48 
_reflns_number_total              2750 
_reflns_number_gt                 2264 
_reflns_threshold_expression      >2sigma(I) 
 
_computing_data_collection        'PROCESS-AUTO' 
_computing_cell_refinement        'PROCESS-AUTO' 
_computing_data_reduction         'CrystalStructure' 
_computing_structure_solution     'SHELXS-97 (Sheldrick, 1990)' 
_computing_structure_refinement   'SHELXL-97 (Sheldrick, 1997)' 
_computing_molecular_graphics     ? 
_computing_publication_material   'CrystalStructure 3.6.0' 
 
_refine_special_details 
; 
 Refinement of F^2^ against ALL reflections.  The weighted R-factor wR and 
 goodness of fit S are based on F^2^, conventional R-factors R are based 
 on F, with F set to zero for negative F^2^. The threshold expression of 
 F^2^ > 2sigma(F^2^) is used only for calculating R-factors(gt) etc. and is 
 not relevant to the choice of reflections for refinement.  R-factors based 
 on F^2^ are statistically about twice as large as those based on F, and R- 
 factors based on ALL data will be even larger. 
; 
 
_refine_ls_structure_factor_coef  Fsqd  
_refine_ls_matrix_type            full 
_refine_ls_weighting_scheme       calc  
_refine_ls_weighting_details 
 'calc w=1/[\s^2^(Fo^2^)+(0.0587P)^2^+0.5172P] where P=(Fo^2^+2Fc^2^)/3' 
_atom_sites_solution_primary      direct 
_atom_sites_solution_secondary    difmap 
_atom_sites_solution_hydrogens    geom 
_refine_ls_hydrogen_treatment     constr 
_refine_ls_extinction_method      none 
_refine_ls_extinction_coef        ? 
_refine_ls_number_reflns          2750 
_refine_ls_number_parameters      146 
_refine_ls_number_restraints      0 
_refine_ls_R_factor_all           0.0621 
_refine_ls_R_factor_gt            0.0506 
_refine_ls_wR_factor_ref          0.1360 
_refine_ls_wR_factor_gt           0.1249 
_refine_ls_goodness_of_fit_ref    1.080 
_refine_ls_restrained_S_all       1.080 
_refine_ls_shift/su_max           0.001 
_refine_ls_shift/su_mean          0.000 
 
loop_ 
 _atom_site_label 
 _atom_site_type_symbol 
 _atom_site_fract_x 
 _atom_site_fract_y 
 _atom_site_fract_z 
 _atom_site_U_iso_or_equiv 
 _atom_site_adp_type 
 _atom_site_occupancy 
 _atom_site_symmetry_multiplicity 
 _atom_site_calc_flag 
 _atom_site_refinement_flags 
 _atom_site_disorder_assembly 
 _atom_site_disorder_group 
O1 O 0.73258(8) -0.0743(2) 0.52671(6) 0.0281(3) Uani 1 1 d . . . 
H1 H 0.7696 -0.1881 0.5131 0.034 Uiso 1 1 calc R . . 
O2 O 0.84958(10) -0.1105(3) 1.03589(7) 0.0422(3) Uani 1 1 d . . . 
C1 C 0.83270(12) -0.4033(3) 0.68062(10) 0.0299(4) Uani 1 1 d . . . 
H1A H 0.8806 -0.3967 0.7286 0.036 Uiso 1 1 calc R . . 
H1B H 0.8645 -0.4235 0.6306 0.036 Uiso 1 1 calc R . . 
H1C H 0.7900 -0.5480 0.6861 0.036 Uiso 1 1 calc R . . 
C2 C 0.77551(10) -0.1583(3) 0.67535(9) 0.0216(3) Uani 1 1 d . . . 
H2 H 0.8207 -0.0142 0.6700 0.026 Uiso 1 1 calc R . . 
C3 C 0.69735(10) -0.1438(3) 0.60226(8) 0.0214(3) Uani 1 1 d . . . 
H3 H 0.6639 -0.3115 0.5955 0.026 Uiso 1 1 calc R . . 
C4 C 0.63055(10) 0.0530(3) 0.62982(9) 0.0203(3) Uani 1 1 d . . . 
C5 C 0.56314(10) 0.1994(3) 0.58351(9) 0.0244(3) Uani 1 1 d . . . 
H5 H 0.5538 0.1827 0.5254 0.029 Uiso 1 1 calc R . . 
C6 C 0.50940(10) 0.3713(3) 0.62385(10) 0.0274(3) Uani 1 1 d . . . 
H6 H 0.4630 0.4734 0.5929 0.033 Uiso 1 1 calc R . . 
C7 C 0.52292(11) 0.3952(3) 0.70874(10) 0.0280(4) Uani 1 1 d . . . 
H7 H 0.4859 0.5145 0.7353 0.034 Uiso 1 1 calc R . . 
C8 C 0.58993(10) 0.2470(3) 0.75551(9) 0.0255(3) Uani 1 1 d . . . 
H8 H 0.5987 0.2625 0.8137 0.031 Uiso 1 1 calc R . . 
C9 C 0.64357(10) 0.0763(3) 0.71531(8) 0.0205(3) Uani 1 1 d . . . 
C10 C 0.72107(10) -0.1035(3) 0.75106(9) 0.0218(3) Uani 1 1 d . . . 
H10 H 0.6911 -0.2649 0.7680 0.026 Uiso 1 1 calc R . . 
C11 C 0.78220(10) 0.0029(3) 0.82328(9) 0.0239(3) Uani 1 1 d . . . 
H11 H 0.8163 0.1555 0.8156 0.029 Uiso 1 1 calc R . . 
C12 C 0.79186(11) -0.1024(3) 0.89733(9) 0.0267(3) Uani 1 1 d . . . 
H12 H 0.7593 -0.2582 0.9039 0.032 Uiso 1 1 calc R . . 
C13 C 0.84891(11) 0.0021(3) 0.97047(9) 0.0299(4) Uani 1 1 d . . . 
C14 C 0.90485(13) 0.2412(4) 0.96409(11) 0.0383(4) Uani 1 1 d . . . 
H14A H 0.9383 0.2830 1.0180 0.046 Uiso 1 1 calc R . . 
H14B H 0.8617 0.3808 0.9457 0.046 Uiso 1 1 calc R . . 
H14C H 0.9512 0.2168 0.9243 0.046 Uiso 1 1 calc R . . 
 
loop_ 
 _atom_site_aniso_label 
 _atom_site_aniso_U_11 
 _atom_site_aniso_U_22 
 _atom_site_aniso_U_33 
 _atom_site_aniso_U_23 
 _atom_site_aniso_U_13 
 _atom_site_aniso_U_12 
O1 0.0424(6) 0.0203(5) 0.0242(5) 0.0018(4) 0.0156(5) 0.0029(5) 
O2 0.0534(8) 0.0481(8) 0.0241(6) 0.0056(5) 0.0002(6) 0.0038(6) 
C1 0.0326(8) 0.0188(7) 0.0385(9) 0.0010(6) 0.0050(7) 0.0035(6) 
C2 0.0242(7) 0.0156(7) 0.0257(7) 0.0009(5) 0.0059(6) -0.0007(5) 
C3 0.0287(7) 0.0172(7) 0.0195(6) 0.0008(5) 0.0078(6) -0.0031(5) 
C4 0.0205(7) 0.0177(7) 0.0230(7) -0.0008(5) 0.0040(5) -0.0052(5) 
C5 0.0243(7) 0.0246(7) 0.0238(7) 0.0013(6) 0.0008(6) -0.0060(6) 
C6 0.0193(7) 0.0271(8) 0.0352(8) 0.0043(6) 0.0003(6) -0.0007(6) 
C7 0.0208(7) 0.0279(8) 0.0361(8) -0.0051(6) 0.0063(6) 0.0008(6) 
C8 0.0238(7) 0.0282(8) 0.0251(7) -0.0040(6) 0.0060(6) -0.0030(6) 
C9 0.0200(7) 0.0196(7) 0.0221(7) 0.0001(5) 0.0029(5) -0.0043(5) 
C10 0.0252(7) 0.0188(7) 0.0218(7) 0.0007(5) 0.0039(6) -0.0016(5) 
C11 0.0237(7) 0.0217(7) 0.0266(7) 0.0013(6) 0.0041(6) 0.0001(6) 
C12 0.0302(8) 0.0246(8) 0.0256(7) 0.0018(6) 0.0041(6) 0.0011(6) 
C13 0.0311(8) 0.0325(9) 0.0264(7) -0.0009(6) 0.0035(6) 0.0081(7) 
C14 0.0376(9) 0.0373(10) 0.0379(9) -0.0020(7) -0.0054(8) -0.0005(8) 
 
_geom_special_details 
; 
 All esds (except the esd in the dihedral angle between two l.s. planes) 
 are estimated using the full covariance matrix.  The cell esds are taken 
 into account individually in the estimation of esds in distances, angles 
 and torsion angles; correlations between esds in cell parameters are only 
 used when they are defined by crystal symmetry.  An approximate (isotropic) 
 treatment of cell esds is used for estimating esds involving l.s. planes. 
; 
 
loop_ 
 _geom_bond_atom_site_label_1 
 _geom_bond_atom_site_label_2 
 _geom_bond_distance 
 _geom_bond_site_symmetry_2 
 _geom_bond_publ_flag 
O1 C3 1.4282(17) . ? 
O1 H1 0.8400 . ? 
O2 C13 1.222(2) . ? 
C1 C2 1.516(2) . ? 
C1 H1A 0.9800 . ? 
C1 H1B 0.9800 . ? 
C1 H1C 0.9800 . ? 
C2 C3 1.540(2) . ? 
C2 C10 1.553(2) . ? 
C2 H2 1.0000 . ? 
C3 C4 1.501(2) . ? 
C3 H3 1.0000 . ? 
C4 C5 1.384(2) . ? 
C4 C9 1.396(2) . ? 
C5 C6 1.391(2) . ? 
C5 H5 0.9500 . ? 
C6 C7 1.386(2) . ? 
C6 H6 0.9500 . ? 
C7 C8 1.390(2) . ? 
C7 H7 0.9500 . ? 
C8 C9 1.385(2) . ? 
C8 H8 0.9500 . ? 
C9 C10 1.515(2) . ? 
C10 C11 1.495(2) . ? 
C10 H10 1.0000 . ? 
C11 C12 1.325(2) . ? 
C11 H11 0.9500 . ? 
C12 C13 1.475(2) . ? 
C12 H12 0.9500 . ? 
C13 C14 1.493(3) . ? 
C14 H14A 0.9800 . ? 
C14 H14B 0.9800 . ? 
C14 H14C 0.9800 . ? 
 
loop_ 
 _geom_angle_atom_site_label_1 
 _geom_angle_atom_site_label_2 
 _geom_angle_atom_site_label_3 
 _geom_angle 
 _geom_angle_site_symmetry_1 
 _geom_angle_site_symmetry_3 
 _geom_angle_publ_flag 
C3 O1 H1 109.5 . . ? 
C2 C1 H1A 109.5 . . ? 
C2 C1 H1B 109.5 . . ? 
H1A C1 H1B 109.5 . . ? 
C2 C1 H1C 109.5 . . ? 
H1A C1 H1C 109.5 . . ? 
H1B C1 H1C 109.5 . . ? 
C1 C2 C3 114.82(12) . . ? 
C1 C2 C10 114.75(12) . . ? 
C3 C2 C10 103.53(12) . . ? 
C1 C2 H2 107.8 . . ? 
C3 C2 H2 107.8 . . ? 
C10 C2 H2 107.8 . . ? 
O1 C3 C4 111.90(12) . . ? 
O1 C3 C2 113.36(12) . . ? 
C4 C3 C2 102.89(11) . . ? 
O1 C3 H3 109.5 . . ? 
C4 C3 H3 109.5 . . ? 
C2 C3 H3 109.5 . . ? 
C5 C4 C9 120.54(14) . . ? 
C5 C4 C3 129.49(13) . . ? 
C9 C4 C3 109.97(12) . . ? 
C4 C5 C6 118.66(14) . . ? 
C4 C5 H5 120.7 . . ? 
C6 C5 H5 120.7 . . ? 
C7 C6 C5 120.67(14) . . ? 
C7 C6 H6 119.7 . . ? 
C5 C6 H6 119.7 . . ? 
C6 C7 C8 120.85(14) . . ? 
C6 C7 H7 119.6 . . ? 
C8 C7 H7 119.6 . . ? 
C9 C8 C7 118.46(14) . . ? 
C9 C8 H8 120.8 . . ? 
C7 C8 H8 120.8 . . ? 
C8 C9 C4 120.82(14) . . ? 
C8 C9 C10 129.07(13) . . ? 
C4 C9 C10 110.12(12) . . ? 
C11 C10 C9 113.87(12) . . ? 
C11 C10 C2 113.91(12) . . ? 
C9 C10 C2 101.98(11) . . ? 
C11 C10 H10 108.9 . . ? 
C9 C10 H10 108.9 . . ? 
C2 C10 H10 108.9 . . ? 
C12 C11 C10 124.09(15) . . ? 
C12 C11 H11 118.0 . . ? 
C10 C11 H11 118.0 . . ? 
C11 C12 C13 125.43(16) . . ? 
C11 C12 H12 117.3 . . ? 
C13 C12 H12 117.3 . . ? 
O2 C13 C12 118.83(17) . . ? 
O2 C13 C14 120.93(16) . . ? 
C12 C13 C14 120.24(15) . . ? 
C13 C14 H14A 109.5 . . ? 
C13 C14 H14B 109.5 . . ? 
H14A C14 H14B 109.5 . . ? 
C13 C14 H14C 109.5 . . ? 
H14A C14 H14C 109.5 . . ? 
H14B C14 H14C 109.5 . . ? 
 
loop_ 
 _geom_torsion_atom_site_label_1 
 _geom_torsion_atom_site_label_2 
 _geom_torsion_atom_site_label_3 
 _geom_torsion_atom_site_label_4 
 _geom_torsion 
 _geom_torsion_site_symmetry_1 
 _geom_torsion_site_symmetry_2 
 _geom_torsion_site_symmetry_3 
 _geom_torsion_site_symmetry_4 
 _geom_torsion_publ_flag 
C1 C2 C3 O1 -80.75(16) . . . . ? 
C10 C2 C3 O1 153.40(12) . . . . ? 
C1 C2 C3 C4 158.22(12) . . . . ? 
C10 C2 C3 C4 32.37(13) . . . . ? 
O1 C3 C4 C5 37.4(2) . . . . ? 
C2 C3 C4 C5 159.45(14) . . . . ? 
O1 C3 C4 C9 -142.96(12) . . . . ? 
C2 C3 C4 C9 -20.94(15) . . . . ? 
C9 C4 C5 C6 0.6(2) . . . . ? 
C3 C4 C5 C6 -179.86(14) . . . . ? 
C4 C5 C6 C7 -0.1(2) . . . . ? 
C5 C6 C7 C8 -0.4(2) . . . . ? 
C6 C7 C8 C9 0.6(2) . . . . ? 
C7 C8 C9 C4 -0.2(2) . . . . ? 
C7 C8 C9 C10 179.29(14) . . . . ? 
C5 C4 C9 C8 -0.4(2) . . . . ? 
C3 C4 C9 C8 179.93(13) . . . . ? 
C5 C4 C9 C10 -179.96(12) . . . . ? 
C3 C4 C9 C10 0.39(16) . . . . ? 
C8 C9 C10 C11 -36.3(2) . . . . ? 
C4 C9 C10 C11 143.24(13) . . . . ? 
C8 C9 C10 C2 -159.42(14) . . . . ? 
C4 C9 C10 C2 20.07(15) . . . . ? 
C1 C2 C10 C11 79.09(16) . . . . ? 
C3 C2 C10 C11 -155.01(12) . . . . ? 
C1 C2 C10 C9 -157.77(12) . . . . ? 
C3 C2 C10 C9 -31.87(13) . . . . ? 
C9 C10 C11 C12 120.56(17) . . . . ? 
C2 C10 C11 C12 -123.05(16) . . . . ? 
C10 C11 C12 C13 -177.79(14) . . . . ? 
C11 C12 C13 O2 177.88(16) . . . . ? 
C11 C12 C13 C14 -2.3(2) . . . . ? 
 
_diffrn_measured_fraction_theta_max    0.993 
_diffrn_reflns_theta_full              27.48 
_diffrn_measured_fraction_theta_full   0.993 
_refine_diff_density_max    0.353 
_refine_diff_density_min   -0.420 
_refine_diff_density_rms    0.057 
